# Supplementary material for: CREB Targets Define the Gene Expression Signature of Malignancies Having Reduced Levels of the Tumor Suppressor Tristetraprolin
Source: PLoS One. 2014 Dec 26;9(12):e115517. doi: 10.1371/journal.pone.0115517 (PMC4277357; doi:10.1371/journal.pone.0115517)
Supplement: S2 Table — TCGA lung adenocarcinomas in the TTP -high and TTP -low quartiles. (XLSX) [file pone.0115517.s005.xlsx]

## Sheet: Sheet1
Table S2. TCGA lung adenocarcinomas in the TTP-high and TTP-low quartiles.
TTP-high quartile		TTP-low quartile
PATIENT	TTP expression (log2)	PATIENT	TTP expression (log2)
TCGA-53-7626	15.3742	TCGA-44-6777	10.9722
TCGA-91-6849	14.9414	TCGA-78-7536	10.9664
TCGA-69-8254	14.7706	TCGA-55-1595	10.9557
TCGA-97-7938	14.6246	TCGA-86-6851	10.9425
TCGA-69-7764	14.3063	TCGA-44-5643	10.9307
TCGA-55-7574	14.149	TCGA-91-6840	10.9288
TCGA-93-7348	14.1366	TCGA-78-7220	10.9119
TCGA-73-4658	14.0779	TCGA-93-7347	10.9026
TCGA-38-7271	14.0514	TCGA-55-5899	10.9001
TCGA-44-6778	14.0398	TCGA-78-7147	10.8969
TCGA-55-6980	14.0332	TCGA-78-7153	10.8915
TCGA-55-8207	14.0144	TCGA-75-5147	10.8836
TCGA-69-8253	14.0034	TCGA-50-6594	10.8834
TCGA-49-4486	13.8973	TCGA-64-5775	10.8745
TCGA-55-7281	13.8793	TCGA-86-7701	10.8699
TCGA-44-6776	13.87	TCGA-95-7947	10.8698
TCGA-67-4679	13.8675	TCGA-95-8039	10.8673
TCGA-75-7030	13.7531	TCGA-86-7711	10.8673
TCGA-44-6148	13.7432	TCGA-86-8055	10.8621
TCGA-80-5608	13.7301	TCGA-38-6178	10.8543
TCGA-69-7763	13.6906	TCGA-86-8281	10.8426
TCGA-05-4250	13.6583	TCGA-44-8117	10.8375
TCGA-69-7980	13.6528	TCGA-91-6836	10.8256
TCGA-05-4384	13.6512	TCGA-49-4494	10.812
TCGA-73-4662	13.5888	TCGA-86-8054	10.7969
TCGA-55-7283	13.5836	TCGA-80-5611	10.7838
TCGA-38-4626	13.5307	TCGA-78-7163	10.7665
TCGA-78-7166	13.4842	TCGA-55-8203	10.7662
TCGA-91-7771	13.4345	TCGA-95-7562	10.7643
TCGA-J2-8194	13.4311	TCGA-55-7726	10.7502
TCGA-49-6742	13.4158	TCGA-91-6829	10.695
TCGA-55-6984	13.3868	TCGA-49-4488	10.6836
TCGA-55-6985	13.3748	TCGA-75-5125	10.6701
TCGA-95-7039	13.3258	TCGA-44-6779	10.6643
TCGA-55-6970	13.3081	TCGA-78-7159	10.6615
TCGA-44-2666	13.3013	TCGA-05-4420	10.6592
TCGA-78-7161	13.2553	TCGA-44-3919	10.6359
TCGA-80-5607	13.2388	TCGA-55-8208	10.6324
TCGA-55-6983	13.2235	TCGA-55-7570	10.5944
TCGA-91-6835	13.1916	TCGA-55-8085	10.572
TCGA-55-8090	13.1747	TCGA-55-6982	10.5587
TCGA-64-5781	13.1742	TCGA-86-8279	10.4788
TCGA-44-7671	13.156	TCGA-49-4514	10.4758
TCGA-49-6744	13.0918	TCGA-55-7914	10.4689
TCGA-49-4510	13.0826	TCGA-50-6593	10.4359
TCGA-97-7553	13.0569	TCGA-97-7937	10.4316
TCGA-91-6828	13.0445	TCGA-38-4630	10.4236
TCGA-44-8119	13.0427	TCGA-50-6590	10.4228
TCGA-55-8206	13.0145	TCGA-78-7146	10.4133
TCGA-64-5815	13.008	TCGA-55-6642	10.3976
TCGA-97-8177	13.0008	TCGA-44-5645	10.3943
TCGA-78-7633	12.9975	TCGA-91-6831	10.388
TCGA-44-7659	12.99	TCGA-05-4396	10.3814
TCGA-67-6216	12.9806	TCGA-97-8175	10.3682
TCGA-67-3774	12.969	TCGA-44-6775	10.3664
TCGA-93-8067	12.9679	TCGA-78-7167	10.32
TCGA-97-7547	12.962	TCGA-55-8096	10.3176
TCGA-69-7974	12.9484	TCGA-44-2659	10.2871
TCGA-91-6830	12.9371	TCGA-55-8301	10.2597
TCGA-64-1680	12.8929	TCGA-55-7994	10.247
TCGA-64-1681	12.8921	TCGA-78-7542	10.2447
TCGA-99-8028	12.8464	TCGA-73-7499	10.2373
TCGA-44-6145	12.8198	TCGA-55-1594	10.1699
TCGA-55-6986	12.8119	TCGA-05-4402	10.1373
TCGA-44-7661	12.8117	TCGA-55-1596	10.1216
TCGA-86-8076	12.8087	TCGA-05-4426	10.1158
TCGA-67-3773	12.7956	TCGA-44-7672	10.1086
TCGA-86-7953	12.7683	TCGA-50-6591	10.0517
TCGA-67-6217	12.7576	TCGA-44-7660	10.0009
TCGA-44-3396	12.7494	TCGA-86-7955	9.99358
TCGA-50-5072	12.7429	TCGA-97-8171	9.98473
TCGA-55-7728	12.74	TCGA-35-5375	9.97997
TCGA-78-7160	12.7362	TCGA-55-7727	9.95661
TCGA-55-7725	12.6893	TCGA-55-8087	9.93775
TCGA-50-5049	12.6877	TCGA-86-7714	9.93296
TCGA-75-5122	12.6588	TCGA-55-6968	9.85667
TCGA-97-8174	12.6555	TCGA-55-7815	9.84051
TCGA-50-6673	12.6269	TCGA-38-4628	9.81356
TCGA-99-8033	12.6126	TCGA-05-4389	9.76897
TCGA-05-4418	12.5981	TCGA-44-7667	9.76371
TCGA-75-5126	12.5854	TCGA-95-7043	9.67279
TCGA-97-7546	12.5682	TCGA-05-5428	9.55758
TCGA-64-5778	12.5642	TCGA-05-4397	9.52801
TCGA-83-5908	12.5377	TCGA-91-6847	9.48287
TCGA-05-4417	12.537	TCGA-75-6211	9.38298
TCGA-86-8075	12.5165	TCGA-49-6767	9.23406
TCGA-55-1592	12.454	TCGA-64-1678	9.11261
TCGA-44-6147	12.4451	TCGA-78-7155	8.46764
