# Supplementary material for: CREB Targets Define the Gene Expression Signature of Malignancies Having Reduced Levels of the Tumor Suppressor Tristetraprolin
Source: PLoS One. 2014 Dec 26;9(12):e115517. doi: 10.1371/journal.pone.0115517 (PMC4277357; doi:10.1371/journal.pone.0115517)
Supplement: S7 Table — Differentially expressed genes in TCGA lung squamous cell carcinoma dataset between high and low TTP -expressing tumors. (XLSX) [file pone.0115517.s010.xlsx]

## Sheet: Sheet1
Table S7. Differentially expressed genes in TCGA lung squamous cell carcinoma dataset between high and low TTP-expressing tumors.
Gene Symbol	Corrected p-value	Fold Change	Regulation in high TTP tumors compared to low TTP tumors
SPRR1B	4.55104e-05	9.19605	up
SPRR2D	4.73233e-05	9.01159	up
SPRR2A	0.00020708	8.91632	up
SPRR2E	0.000100486	8.82043	up
IVL	2.17787e-05	7.95101	up
SPRR1A	0.000727228	7.64767	up
SPRR2G	1.15909e-05	7.50816	up
SPRR2C	6.5715e-06	7.37987	up
FOSB	5.51271e-15	7.32414	up
SFTPC	0.0051613	6.8442	up
S100A7	0.000844282	6.72426	up
SPRR3	0.00656699	6.41778	up
CSF3	4.31293e-08	6.38437	up
DMBT1	0.000247929	6.16958	up
FGG	0.00205183	6.1489	up
SPRR2B	8.14305e-06	6.00574	up
RHCG	0.000994667	5.99676	up
FOS	7.7908e-21	5.85397	up
S100A7A	0.00107162	5.69793	up
ZFP36	0	5.69137	up
SBSN	0.000578577	5.67992	up
LCE3D	0.000128067	5.65701	up
SFTPA1	0.00502067	5.63578	up
PGLYRP3	4.79724e-05	5.58827	up
SERPINB3	0.000376614	5.55174	up
KRTDAP	0.00189344	5.42049	up
SERPINB4	0.000490468	5.40339	up
S100A8	4.5979e-05	5.39832	up
SFTPD	0.000329837	5.27388	up
KRT16	0.00023317	5.24877	up
SPRR2F	0.000443538	5.23503	up
SERPINB7	0.000212831	5.21547	up
SCEL	9.09526e-06	5.20697	up
SFTPA2	0.00667105	5.10457	up
LY6D	0.00851996	5.0497	up
HBA1	4.79724e-05	5.00861	up
CEACAM5	0.0046406	4.87049	up
SFTPB	0.00596758	4.80277	up
CXCL2	2.84928e-09	4.78683	up
PGC	0.00359736	4.66554	up
FAM83A	0.000318906	4.62339	up
CRCT1	0.000314275	4.59245	up
NCCRP1	0.000105966	4.56897	up
S100A12	3.57437e-05	4.49377	up
FGA	0.00367399	4.47478	up
NAPSA	0.0046406	4.43515	up
SFTA3	0.00151952	4.30717	up
C19orf33	0.000230454	4.30365	up
SLC34A2	0.00139634	4.28695	up
S100A9	0.000148339	4.2842	up
DUSP1	1.1148e-18	4.18984	up
IL1F9	0.00427127	4.17666	up
EGR1	2.02886e-16	4.17335	up
IL1RL1	1.33496e-07	4.17282	up
A2ML1	0.00737383	4.15783	up
PEBP4	0.00107221	4.11048	up
PI3	0.00166357	4.0517	up
DMKN	1.30747e-05	4.01336	up
ROS1	0.000895734	3.98854	up
IL1F5	0.00340648	3.98183	up
PLA2G4E	4.70398e-05	3.98103	up
EDN2	0.000579519	3.93525	up
KRT6C	0.00177192	3.93209	up
KRT6A	0.00286305	3.89948	up
CYP2B7P1	0.000218293	3.88153	up
AQP3	2.18264e-05	3.85804	up
AGTR2	0.00205183	3.83693	up
IL1A	0.00174115	3.81747	up
NR4A1	5.98946e-13	3.76928	up
CEACAM7	0.00245975	3.7584	up
CEACAM6	0.000966527	3.75784	up
RNASE7	0.00117634	3.75028	up
SERPINB2	0.00532167	3.74677	up
KRT6B	0.00212159	3.74366	up
HP	0.00645239	3.72724	up
HEPHL1	0.00206591	3.69272	up
KRT14	0.0481247	3.68834	up
SDR16C5	0.000195904	3.67512	up
NR4A3	3.05596e-09	3.6324	up
SERPINB13	0.0192084	3.61621	up
C10orf99	0.0093619	3.58063	up
TMPRSS11D	0.0372502	3.57262	up
LCE3E	0.000397681	3.53384	up
LOC100131726	4.04948e-05	3.4998	up
FUT3	1.83694e-05	3.4957	up
C12orf36	0.00543254	3.43587	up
MUC21	0.00108699	3.42862	up
SPRR4	0.000715515	3.40253	up
NKX2-1	0.00203503	3.39039	up
SERPINB11	0.00877073	3.38762	up
SFTA2	0.00637186	3.35983	up
CTSE	0.0123872	3.34072	up
MSLN	0.00929191	3.30282	up
C4BPA	0.0176705	3.30114	up
ATP13A4	0.00164212	3.29946	up
SLC6A14	0.00118602	3.2932	up
RAET1E	0.000793645	3.29277	up
MUC5B	0.0154442	3.2459	up
CXCL1	0.000602797	3.23422	up
FUT6	0.000437274	3.22661	up
TGM1	0.00147497	3.21365	up
C16orf89	0.0051613	3.20932	up
EGR3	1.76874e-10	3.20565	up
SULT2B1	7.25577e-06	3.1775	up
SCGB3A2	0.0324062	3.17347	up
AG2	3.95504e-11	3.17036	up
IL6	0.000131196	3.13921	up
DSG3	0.0297447	3.11938	up
CXCL17	0.00178648	3.11677	up
PSORS1C2	0.00146834	3.11601	up
SLPI	5.11227e-05	3.1137	up
ZNF750	0.000199547	3.0996	up
AHNAK2	0.000793645	3.09831	up
STEAP4	6.41166e-05	3.09347	up
CFTR	0.000998741	3.09006	up
THBD	3.00067e-06	3.07991	up
AQP4	0.0148135	3.07602	up
CYP4B1	0.0093619	3.07156	up
SELE	0.000549183	3.03289	up
CXCR1	0.000315126	3.03071	up
LYPD3	0.000460304	3.00365	up
AMY1A	0.0121183	2.99904	up
HHIP	0.00761131	2.99423	up
CYR61	8.19274e-12	2.99097	up
KIAA0408	0.00197816	2.99058	up
CLIC3	0.000362349	2.98926	up
IER3	5.86841e-11	2.9883	up
CLDN18	0.0195212	2.98691	up
NIPAL4	0.00190955	2.98215	up
CRTAC1	0.0067089	2.98107	up
PGLYRP4	0.00682066	2.9718	up
ORM2	0.00796662	2.96758	up
HAS1	0.000105966	2.96719	up
RRAD	4.80518e-05	2.9671	up
ADH1B	0.026745	2.9642	up
DARC	8.43196e-05	2.95526	up
C7	0.0093619	2.94219	up
WFDC12	0.000442596	2.93417	up
WNT7A	0.00499063	2.93099	up
NFKBIZ	9.73811e-09	2.93011	up
PDZK1IP1	0.00168604	2.92937	up
LTF	0.0219519	2.92534	up
LY6G6C	0.0107529	2.91261	up
GPR115	0.00183758	2.88789	up
FAM83C	0.0378044	2.8874	up
FCGR3B	0.00161423	2.88059	up
PSCA	0.01347	2.87865	up
CHIA	0.00176306	2.87826	up
FGF19	0.0470708	2.87444	down
ORM1	0.00863914	2.87389	up
GPRC5A	0.000484114	2.86791	up
DEFB103B	0.00183588	2.86014	up
AGER	0.00201989	2.85797	up
KRT17	0.00630755	2.8572	up
FABP4	0.0211478	2.85624	up
SLC5A8	0.00725764	2.85468	up
CYP2C18	0.00514816	2.85257	up
PRG4	0.00186811	2.8491	up
CAPNS2	0.0221738	2.84514	up
JUNB	1.7566e-12	2.8405	up
SERPIND1	0.00816321	2.82736	up
PLEKHN1	2.66891e-05	2.81677	up
FAM25A	0.00301244	2.81619	up
AGR3	0.0105972	2.7994	up
SLC26A9	0.00132269	2.79154	up
ZC3H12A	1.74121e-08	2.78934	up
ASPG	0.00159701	2.78903	up
NR4A2	5.94688e-08	2.76711	up
SCGB3A1	0.041018	2.76657	up
GJB2	0.00360697	2.7599	up
VGLL1	0.010826	2.75936	up
BCAS1	0.00467676	2.7556	up
CH25H	6.87917e-05	2.74962	up
S100A2	0.0172701	2.74588	up
BNIPL	0.000346314	2.73214	up
CDSN	0.00553327	2.73062	up
SLC6A15	0.0491534	2.70882	down
CACNA2D2	0.00202868	2.70313	up
LGI3	0.020362	2.70304	up
KRT1	0.041627	2.69914	up
ADAMTS16	0.00482286	2.69784	up
GSDMC	0.0015509	2.69394	up
CNFN	0.000599313	2.68209	up
SLC10A6	0.00177192	2.67868	up
PCDP1	0.00577507	2.66949	up
PLA2G2A	0.0200602	2.66669	up
IL1RN	0.00032949	2.66195	up
HBA2	0.000837799	2.65198	up
DEFB4A	0.0197581	2.64626	up
RPTN	0.0345215	2.63559	up
SDR9C7	0.00086379	2.63246	up
PLA2G1B	0.000573053	2.62582	up
C4orf31	0.00378207	2.62535	up
CAPN8	0.00474368	2.62277	up
FAM107A	6.42235e-05	2.62068	up
PTK6	0.000626111	2.61665	up
PIGR	0.0177587	2.61639	up
FOLR1	0.0222484	2.61618	up
CST6	0.00344794	2.61233	up
CCL14	0.00076699	2.60948	up
GPR110	0.00832616	2.60727	up
TMPRSS2	0.00461291	2.60257	up
SCNN1B	0.000793645	2.5938	up
EPS8L1	4.28528e-05	2.58416	up
PRSS27	0.0012176	2.57614	up
KRT78	0.0167673	2.57455	up
SERPINE1	1.98634e-06	2.57051	up
VNN3	0.00187598	2.57037	up
KRT24	0.0261077	2.56631	up
MUC1	0.000215412	2.56308	up
TNS4	0.00124549	2.55542	up
HABP2	0.00488696	2.54812	up
KNDC1	0.00202082	2.54787	up
ADRB2	6.24749e-05	2.54531	up
TACSTD2	0.000426115	2.54466	up
IL1F6	0.00225671	2.53928	up
BNC1	0.0313947	2.53913	up
WFDC5	0.0240481	2.53361	up
SFTA1P	0.00182408	2.52993	up
CLDN2	0.00152984	2.5251	up
ADRA2A	4.98562e-05	2.52199	up
MMP28	0.00125393	2.51978	up
DUOX2	0.00803342	2.51592	up
SCTR	0.0158083	2.51293	up
HNF1B	0.0125052	2.49758	up
NOVA1	0.00145411	2.49361	down
DUOXA2	0.00344794	2.48258	up
CCL20	0.0182139	2.48003	up
VSIG2	0.0109076	2.47892	up
CXCL3	0.00108699	2.47292	up
AIM1L	0.000217113	2.47057	up
MALL	3.98065e-05	2.46878	up
PLCXD3	0.00321304	2.46574	up
KCNH8	0.0124209	2.45896	down
EDN1	3.02838e-05	2.45762	up
PAH	0.0262033	2.45513	down
SLC6A4	0.0230933	2.45421	up
GADD45B	3.57968e-12	2.45386	up
ALOX15B	0.00256949	2.44704	up
SLIT3	0.000572776	2.44526	up
JUN	6.03798e-12	2.44227	up
ALPL	0.000259946	2.44123	up
SCARA5	0.00814264	2.44096	up
SPDEF	0.0180877	2.44032	up
ANKRD1	0.0063377	2.43813	up
FAM3D	0.0181995	2.43352	up
GJB3	0.00624977	2.43167	up
ENDOU	0.00470345	2.42755	up
TNXB	0.000792225	2.42215	up
EREG	0.0287643	2.42116	up
EGR4	0.000377384	2.42048	up
IGF2	0.0268417	2.41874	up
CSRNP1	2.717e-14	2.41331	up
PCDHGC5	0.00318914	2.41089	up
MUC4	0.0293546	2.41081	up
SV2B	0.0247059	2.41048	down
COL6A6	0.00488597	2.41024	up
C8orf4	0.00110207	2.40979	up
C1orf116	4.26802e-05	2.40843	up
CYP4F22	0.00489344	2.40795	up
TRIM54	0.0141562	2.40473	down
F3	0.00032949	2.4005	up
S100A14	0.00925829	2.39474	up
SDCBP2	0.00145237	2.39203	up
FAM83E	0.000524722	2.38646	up
C10orf82	0.0159523	2.38527	down
APOBEC3A	0.00291474	2.38465	up
HES2	0.00557068	2.38271	up
DES	0.00720815	2.3824	up
SOCS3	9.28869e-11	2.3818	up
CABYR	0.00816511	2.37302	down
RND2	0.0104348	2.36889	down
LRP1B	0.0290703	2.36798	down
PLA2G2F	0.00870961	2.36707	up
TCHH	0.0230247	2.36701	up
FAT4	1.64603e-05	2.36564	up
SERPINA3	0.0286761	2.36452	up
PCP4L1	0.0168461	2.36448	up
CHRDL2	0.00591896	2.36367	up
IGFL2	0.014578	2.36318	up
ALOX12B	0.0177858	2.35955	up
IL20RB	0.0181995	2.3594	up
ADAMTS8	0.00439359	2.35752	up
RNF39	9.72727e-05	2.35417	up
ANGPTL4	0.000376614	2.34451	up
LRRK2	0.00284329	2.34328	up
CEACAM19	0.000126121	2.34027	up
SUSD2	0.00118602	2.3383	up
TMPRSS11F	0.0339532	2.33734	up
HBB	0.0100936	2.33591	up
RAET1G	0.00310742	2.33466	up
SLC46A2	0.00165505	2.33397	up
FCN3	0.00105807	2.33098	up
SFRP2	0.00213102	2.33062	up
KRT34	0.0113227	2.33014	up
DSG1	0.0484433	2.32812	up
SIK1	1.51049e-07	2.32679	up
IL33	0.00131554	2.32672	up
RASGRF1	0.00881225	2.32549	up
OSM	4.98562e-05	2.32214	up
ZNF385B	0.00954937	2.31936	up
KRT80	0.0026797	2.31342	up
ISM1	0.00148082	2.30812	up
METRNL	1.6407e-06	2.30219	up
ALOXE3	0.00323541	2.30048	up
HBEGF	1.89135e-05	2.29931	up
WNT7B	0.00245975	2.29769	up
SLC22A3	0.00706114	2.29528	up
LOC100302650	1.20811e-08	2.29145	up
TRIM7	0.00977034	2.29073	up
MACROD2	0.00632138	2.2887	up
CHI3L2	0.0103163	2.28706	up
GPIHBP1	0.00293256	2.28595	up
SPINK6	0.00474144	2.28505	up
IER2	1.7566e-12	2.27837	up
CCDC64B	0.000716926	2.27758	up
NPR1	5.30308e-05	2.27495	up
CTGF	1.89825e-06	2.274	up
C2CD4B	0.0010641	2.27048	up
C9orf169	0.00563351	2.26801	up
HSPB6	4.79724e-05	2.26528	up
CSF3R	0.000319658	2.2639	up
ABCA3	0.0171762	2.26204	up
TPSB2	0.00286304	2.25689	up
DUSP5	2.44517e-06	2.2564	up
ITPKC	6.65944e-14	2.25635	up
KCNK6	5.46411e-08	2.24956	up
KLF4	2.95122e-06	2.24634	up
DUOXA1	0.0015509	2.2414	up
FLRT3	0.00624977	2.24019	up
CDH16	0.00816018	2.23956	up
NLGN1	0.0155348	2.23943	down
MLLT11	0.000372678	2.23893	down
FAM46B	0.00118194	2.236	up
UCHL1	0.0492266	2.23531	down
CREB3L1	0.000894077	2.23405	up
ATP10B	0.00799397	2.22824	up
DEGS2	0.00546533	2.22779	up
OVOL1	0.000994109	2.22668	up
ST6GALNAC1	0.0113037	2.22547	up
TCF21	0.000132776	2.22332	up
CPA4	0.04718	2.21963	up
CILP	0.0214583	2.21368	up
WBSCR17	0.000793645	2.21324	up
OLR1	0.00129851	2.21312	up
EPHA2	7.62561e-05	2.21204	up
GPR109A	0.000460969	2.21199	up
SPON1	0.00239353	2.20746	up
ADAM6	0.0273777	2.20482	up
INHBA	0.00177244	2.19861	up
PRSS22	0.00122715	2.19404	up
FABP5	0.00656699	2.19273	up
ID1	0.000179872	2.19253	up
MFAP4	0.000817443	2.18721	up
AREG	0.00610872	2.18569	up
SOX7	0.000710046	2.18439	up
SLC28A3	0.00750291	2.17979	up
GRHL3	0.026745	2.17534	up
LEPREL1	0.00853059	2.17293	up
SLC39A2	0.0283009	2.17	up
MMP23B	0.00023317	2.16613	up
ADAMTS1	4.92254e-05	2.16571	up
CNN1	0.000152189	2.165	up
RNF222	0.00203503	2.15954	up
SELP	0.00354278	2.15392	up
SSC5D	0.0010641	2.15165	up
AOC3	0.000362349	2.14992	up
SPINK5	0.029888	2.14681	up
XIRP1	0.00610305	2.1429	up
NRGN	0.000332609	2.14182	up
PTGDS	0.00662229	2.1418	up
PCYT1B	0.0213585	2.13901	down
RHOV	0.00173064	2.13894	up
TGM5	0.0448664	2.13848	up
DLC1	7.10558e-06	2.13743	up
C3	0.000431934	2.13393	up
CPB2	0.03668	2.13369	up
KLF2	1.27015e-07	2.13148	up
DUOX1	0.00254091	2.13144	up
DIO3	0.00543254	2.13033	up
GPR77	0.000685872	2.12679	up
MEG3	0.00725764	2.12644	up
JPH2	0.000458729	2.12593	up
C19orf59	0.00533374	2.1239	up
C14orf34	0.0222405	2.12323	up
SCG3	0.0468238	2.12093	down
SERPINA1	0.00470345	2.11877	up
COL1A1	0.00378207	2.11866	up
ADAM33	0.000935479	2.11754	up
MAP3K8	1.09059e-07	2.11696	up
RND1	0.00608877	2.11693	up
NEAT1	1.12835e-05	2.11144	up
MRGPRF	0.000148339	2.10945	up
MUC6	0.0354709	2.10906	up
EGR2	5.01567e-05	2.10744	up
C6	0.0324506	2.10516	up
GALNT5	0.0106966	2.10247	up
TMC5	0.0396784	2.10093	up
LPL	0.00227847	2.09811	up
CCBP2	0.00132069	2.09782	up
ARL4D	0.00190504	2.09494	up
HAS3	0.029288	2.0899	up
ACTG2	0.00197816	2.08965	up
PPL	0.000560207	2.08947	up
MLPH	0.0107248	2.0887	up
XDH	0.0048623	2.08839	up
TSPAN10	0.00493549	2.08717	up
NOL4	0.0116824	2.08299	down
PPP1R15A	6.65944e-14	2.07895	up
HOPX	0.00159701	2.07718	up
GALNTL2	0.00280654	2.0754	up
GRID1	0.0013951	2.07091	up
IL1B	0.00418312	2.07056	up
CXCR2	0.00725764	2.06984	up
PTGS2	0.0295756	2.06934	up
PDZD2	0.00482286	2.06875	up
FCER1A	0.00937531	2.0672	up
FUT2	0.00193344	2.06574	up
CADM3	0.0144477	2.06537	up
IL8	0.0384304	2.06429	up
MXD1	1.20247e-08	2.06309	up
CSTA	0.0366421	2.05875	up
KLF6	9.78571e-09	2.05751	up
RCN3	0.00116336	2.05667	up
PPP1R13L	1.89734e-05	2.05387	up
FOSL1	0.0051613	2.0478	up
CPM	0.000669385	2.04706	up
FGF3	0.0469467	2.04357	down
AMN	0.00720934	2.04322	up
AQP1	0.000310981	2.04263	up
EVPL	0.00076699	2.04208	up
LOC643008	0.00764308	2.04052	up
THBS1	4.26802e-05	2.03795	up
SPNS2	4.15143e-05	2.03592	up
KCNJ12	0.00725764	2.03466	up
FFAR2	0.0135916	2.03294	up
MS4A15	0.0333469	2.03267	up
SCNN1D	0.00156866	2.03088	up
TNFAIP3	8.69063e-05	2.02693	up
B3GNT8	0.000565795	2.02601	up
COL4A3	0.0247204	2.02377	up
GGTLC1	0.00796662	2.02064	up
MGLL	4.64711e-05	2.01828	up
C5AR1	3.83187e-05	2.01699	up
MEOX2	0.00198236	2.01638	up
ADM	0.00103438	2.01471	up
C1orf161	0.0308454	2.01435	up
XPNPEP2	0.00662229	2.0142	up
SLCO4A1	0.0103419	2.00965	up
GAS1	0.00240657	2.0095	up
IL11	0.00877073	2.0091	up
SCNN1G	0.0181995	2.00685	up
BTNL9	0.0249135	2.00676	up
LIF	0.000449165	2.00626	up
TMEM45A	0.00816321	2.00595	up
PEX5L	0.0193145	2.00226	down
DNAJC6	0.00563351	2.00178	down
LRG1	0.0103482	2.00158	up
